# Supplementary material
Source: HighWire-hosted journal article supplement (https://hw-f5-jim.highwire.org/content/69/8/1464)
Supplement: inline-supplementary-material-1 [file inline-supplementary-material-1.pdf]

Supplementary Table 1 Comparison of indicators of routine blood examination of children with HSP 3 months after admission

|                    | Control group | Restricted diet group     | Dietary guidance group    |
|--------------------|---------------|---------------------------|---------------------------|
| WBC( $10^9/L$ )    | 6.62±0.60     | 6.93±0.65                 | 6.48±0.46                 |
| RBC( $10^{12}/L$ ) | 4.44±0.41     | 3.53±0.29 <sup>a</sup>    | 4.39±0.39 <sup>b</sup>    |
| HB(g/L)            | 132.27±11.16  | 109.20±10.42 <sup>a</sup> | 134.60±12.38 <sup>b</sup> |
| PLT( $10^9/L$ )    | 207.20±18.29  | 225.77±17.67              | 218.40±18.29              |

Note: <sup>a</sup> compared with control group,  $P<0.05$ ; <sup>b</sup> compared with restricted diet group,  $P<0.05$ .

Supplementary Table 2 Comparison of detection rate of anemia between dietary guidance group and restricted diet group

|                                | Restricted diet group | Dietary guidance group |
|--------------------------------|-----------------------|------------------------|
| Normal (HB: $>120g/L$ )        | 9(30)                 | 26(86.67) <sup>a</sup> |
| Mild anemia (HB: 90-120g/L)    | 14(46.47)             | 4(13.33) <sup>a</sup>  |
| Moderate anemia (HB: 60-90g/L) | 7(23.33)              | 0(0) <sup>a</sup>      |
| Severe anemia (HB $<60g/L$ )   | 0(0)                  | 0(0)                   |

Note: <sup>a</sup> compared with restricted diet group,  $P<0.05$ .

Supplementary Table 3 Comparison of indicators of blood biochemical test of children with HSP

|                       | 1 month after admission |                        | 2 months after admission |                        | 3 months after admission |                        | Control group |
|-----------------------|-------------------------|------------------------|--------------------------|------------------------|--------------------------|------------------------|---------------|
|                       | Restricted diet group   | Dietary guidance group | Restricted diet group    | Dietary guidance group | Restricted diet group    | Dietary guidance group |               |
| Triglyceride (mmol/L) | 0.41±0.02 <sup>a</sup>  | 1.04±0.01 <sup>b</sup> | 0.42±0.05 <sup>a</sup>   | 1.06±0.07 <sup>b</sup> | 0.46±0.02 <sup>a</sup>   | 1.10±0.05 <sup>b</sup> | 1.15±0.09     |
| Cholesterol (mmol/L)  | 2.85±0.21 <sup>a</sup>  | 4.31±0.36 <sup>b</sup> | 3.09±0.22 <sup>a</sup>   | 4.35±0.33 <sup>b</sup> | 3.17±0.27 <sup>a</sup>   | 4.48±0.29 <sup>b</sup> | 4.62±0.37     |

|                           |                         |                                      |                          |                                      |                                      |                                      |                          |
|---------------------------|-------------------------|--------------------------------------|--------------------------|--------------------------------------|--------------------------------------|--------------------------------------|--------------------------|
| Prealbu<br>min<br>(mg/L)  | 86.83±6.09 <sup>a</sup> | 311.20±20.1 <sup>9<sup>b</sup></sup> | 104.20±9.33 <sup>a</sup> | 304.53±23.1 <sup>9<sup>b</sup></sup> | 126.53±12.2 <sup>1<sup>a</sup></sup> | 304.60±24.3 <sup>3<sup>b</sup></sup> | 289.00±15.6 <sup>2</sup> |
| Total<br>protein<br>(g/L) | 43.83±3.91 <sup>a</sup> | 67.59±5.20 <sup>b</sup>              | 39.08±3.35 <sup>a</sup>  | 71.30±4.96 <sup>b</sup>              | 47.94±3.16 <sup>a</sup>              | 68.89±5.55 <sup>b</sup>              | 69.96±5.45               |
| Albumin<br>(g/L)          | 21.51±1.97 <sup>a</sup> | 43.98±3.84 <sup>b</sup>              | 22.49±1.82 <sup>a</sup>  | 46.68±3.93 <sup>b</sup>              | 23.26±2.04 <sup>a</sup>              | 43.11±3.93 <sup>b</sup>              | 45.50±4.10               |
| Globulin<br>(g/L)         | 17.88±1.02 <sup>a</sup> | 24.73±2.09 <sup>b</sup>              | 19.72±1.49 <sup>a</sup>  | 24.99±2.12 <sup>b</sup>              | 22.93±2.25 <sup>a</sup>              | 26.17±2.65 <sup>b</sup>              | 25.94±2.04               |

Note: <sup>a</sup> compared with control group,  $P<0.05$ ; <sup>b</sup> compared with restricted diet group,  $P<0.05$ .

Supplementary Table 4 Comparison of indicators of physical examination of children with HSP

|                                               | Restricted diet group |                           | Dietary guidance group |                         | Control group |
|-----------------------------------------------|-----------------------|---------------------------|------------------------|-------------------------|---------------|
|                                               | Before<br>treatment   | After<br>treatment        | Before<br>treatment    | After treatment         |               |
| Height (cm)                                   | 119.53±11.46          | 120.27±11.19              | 119.50±11.94           | 120.31±11.85            | 119.75±8.45   |
| Weight (kg)                                   | 25.47±1.55            | 21.93±2.40 <sup>a,b</sup> | 25.47±2.08             | 25.00±2.42 <sup>c</sup> | 26.55±2.44    |
| Upper arm<br>circumference (cm)               | 16.54±1.39            | 13.88±1.17 <sup>a,b</sup> | 16.90±1.53             | 17.17±1.74 <sup>c</sup> | 17.52±1.66    |
| Skinfold thickness of<br>triceps brachii (mm) | 12.64±1.16            | 9.83±0.18 <sup>a,b</sup>  | 12.32±1.19             | 12.87±0.54 <sup>c</sup> | 13.11±0.65    |
| Subscapular skinfold<br>thickness (mm)        | 9.33±0.03             | 8.13±0.69 <sup>a,b</sup>  | 9.67±0.85              | 10.07±1.04 <sup>c</sup> | 10.77±1.01    |
| BMI(kg/m <sup>2</sup> )                       | 20.04±1.59            | 17.85±1.40 <sup>a,b</sup> | 19.94±1.78             | 20.41±1.70 <sup>c</sup> | 20.45±1.78    |

Note: <sup>a</sup> compared with control group,  $P<0.05$ ; <sup>b</sup> compared with restricted diet group before treatment,  $P<0.05$ ; <sup>c</sup> compared with restricted diet group after treatment,  $P<0.05$ .

Supplementary Table 5 Comparison of evaluation of BMI among three groups

|                      | Control group | Restricted diet group  | Dietary guidance group |
|----------------------|---------------|------------------------|------------------------|
| Normal               | 21(70)        | 13(43.33) <sup>a</sup> | 24(80.00) <sup>b</sup> |
| Chronic malnutrition | 2(6.67)       | 17(56.67) <sup>a</sup> | 2(6.67) <sup>b</sup>   |
| Overweight           | 5(16.67)      | 0(0) <sup>a</sup>      | 3(10) <sup>b</sup>     |
| Obesity              | 2(6.67)       | 0(0) <sup>a</sup>      | 1(3.33) <sup>b</sup>   |

Note: <sup>a</sup> compared with control group,  $P<0.05$ ; <sup>b</sup> compared with restricted diet group,  $P<0.05$ .

Supplementary Table 6 Comparison of complications of children with HSP between dietary guidance group and restricted diet group

|                                                 | Restricted diet group | Dietary guidance group  |
|-------------------------------------------------|-----------------------|-------------------------|
| Time of complete skin rash disappearance (days) | 18.5±1.75             | 11.25±1.05 <sup>a</sup> |
| Repeated rashes [n(%)]                          | 14(46.67%)            | 6(20%) <sup>a</sup>     |
| Rash recurrence [n(%)]                          | 8(26.67%)             | 2(6.67%) <sup>a</sup>   |
| Renal involvement [n(%)]                        | 19(63.33%)            | 11(36.67%) <sup>a</sup> |

Note: <sup>a</sup> compared with restricted diet group,  $P<0.05$ .
